# Supplementary material
Source: Springer Nature journal article supplement (https://www.springermedizin.de/resource/supplementary/13063_2014_2363_MOESM4_ESM.pdf/9621870)
Supplement: MOESM4 [file 9621870]

**Adults with grade II, III and IV circumferential degree haemorrhoids**

**Ineligible**

- previous surgery for haemorrhoids (except RBL and HALO)
- pre-existing sphincter injury
- peri-anal sepsis
- known inflammatory bowel disease
- malignant gastrointestinal disease in last 5 years
- pregnant women
- medically unfit for surgery

**Assessed for eligibility**

**Consented**

**Not recruited**

- declined
- patient missed

**Baseline**

EQ-5D, SF-36, Pain VAS, Haemorrhoid Symptom Score and Cleveland Incontinence Score, relevant clinical data

**RANDOMISED**

**Stapled Haemorrhoidopexy (SH)**  
(operative details recorded)

**Traditional Haemorrhoidectomy (TH)**  
(operative details recorded)

**1 week**

EQ-5D, Pain VAS, analgesia

**1 week**

EQ-5D, Pain VAS, analgesia

**3 weeks**

EQ-5D, Pain VAS, analgesia

**3 weeks**

EQ-5D, Pain VAS, analgesia

**6 weeks**

EQ-5D, SF-36, Pain VAS, Haemorrhoid Symptom Score, Cleveland Incontinence Score, time to return to usual activities, analgesia and clinical follow-up

**6 weeks**

EQ-5D, SF-36, Pain VAS, Haemorrhoid Symptom Score, Cleveland Incontinence Score, time to return to usual activities, analgesia and clinical follow-up

**12 months**

EQ-5D, SF-36, Haemorrhoid Symptom Score, Cleveland Incontinence Score, patient reported recurrence, Health care utilisation questions

**12 months**

EQ-5D, SF-36, Haemorrhoid Symptom Score, Cleveland Incontinence Score, patient reported recurrence, Health care utilisation questions

**18 months:** EQ5D if not completed at 12 months

**18 months:** EQ5D if not completed at 12 months

**24 months**

EQ-5D, SF-36, Haemorrhoid Symptom Score, Cleveland Incontinence Score, patient reported recurrence and Health care utilisation questions  
Hospital Statistics for further surgery

**24 months**

EQ-5D, SF-36, Haemorrhoid Symptom Score, Cleveland Incontinence Score, patient reported recurrence and Health care utilisation questions  
Hospital Statistics for further surgery

**27 months:** Travel costs questionnaire

**27 months:** Travel costs questionnaire

**Possible longer term follow-up**

**60 months**

EQ-5D, SF-36, Haemorrhoid Symptom Score, Cleveland Incontinence Score, patient reported recurrence  
Hospital Statistics for further surgery

**60 months**

EQ-5D, SF-36, Haemorrhoid Symptom Score, Cleveland Incontinence Score, patient reported recurrence  
Hospital Statistics for further surgery
